**On immunoglobulin heavy chain gene switching: two  $\gamma 2b$  genes are rearranged via switch sequences in MPC-11 cells but only one is expressed**

Rhonda B. Lang, Lawrence W. Stanton and Kenneth B. Marcu

Biochemistry Department and Molecular Biology Graduate Program, SUNY at Stony Brook, NY 11794, USA

Received 21 October 1981; Revised and Accepted 23 November 1981

**ABSTRACT**

During B lymphocyte differentiation, switches in the expression of heavy chain immunoglobulin constant region ( $C_H$ ) genes occur by a novel DNA recombination mechanism. We have investigated the requirements of the  $C_H$  gene switch by characterizing two rearranged  $\gamma 2b$  genes from a  $\gamma 2b$  producing mouse myeloma (MPC-11). One of the two  $\gamma 2b$  genes is present in 2-3 copies per cell ( $\gamma 2b$  strong hybridizer) while the other is present in  $\sim 1$  copy per cell ( $\gamma 2b$  weak hybridizer). Genomic clones of the  $\gamma 2b$  strongly hybridizing gene indicate that this is an abortive switch event between the  $S_{\gamma 3}$  and  $S_{\gamma 2b}$  regions. However, clones of the  $\gamma 2b$  weakly hybridizing gene suggest a functional rearrangement due to the presence of  $V_H$ ,  $J_H$  and  $S_{\mu}$  sequences. The switch-recombination sites of these rearranged  $\gamma 2b$  genes and those of other  $C_H$  genes show a high degree of preference for the sequence AGGTTG 5' of either the  $S_{\mu}$  donor site or the appropriate  $C_H$  S acceptor site. AGGTTG and its analogs are rare in the  $S_{\mu}$  region, are somewhat prevalent in  $S_{\alpha}$  and in the case of  $S_{\mu}$  are found 5' of a tandemly repeated DNA sequence (GAGCT, GGGGT) comprising most of  $S_{\mu}$ .

**INTRODUCTION**

It is now a well accepted premise that a functional heavy chain immunoglobulin gene is created by two independent somatic DNA recombination events during B lymphocyte differentiation (1-3). The first recombination involves one of several hundred  $V_H$  genes, potentially one of a number of  $D_H$  mini-genetic elements and one of four  $J_H$  mini-genetic elements yielding a transcriptionally competent  $VDJ C_{\mu}$  gene (3,4). The second DNA recombination event involves a switch in expression from  $C_{\mu}$  to one of six other  $C_H$  genes ( $\gamma 3$ ,  $\gamma 1$ ,  $\gamma 2b$ ,  $\gamma 2a$ ,  $\epsilon$  or  $\alpha$ ) with no additional  $V_H$  gene rearrangements (2,3,5,6).  $C_{\delta}$  would appear to be uniquely expressed by the differential RNA processing of a complex  $\mu$  and  $\delta$  transcription unit (7-9). The switch-recombination process may be manifested by sister chromatid exchanges which result in DNA deletions between  $C_H$  switch sites (6). A diagram of these events is shown in Figure 1.

A number of switch donor sites 5' of  $C_{\mu}$  and switch acceptor sites 5' of the  $\gamma 1$ ,  $\gamma 2b$  and  $\alpha$  genes have been extensively characterized. In the case of

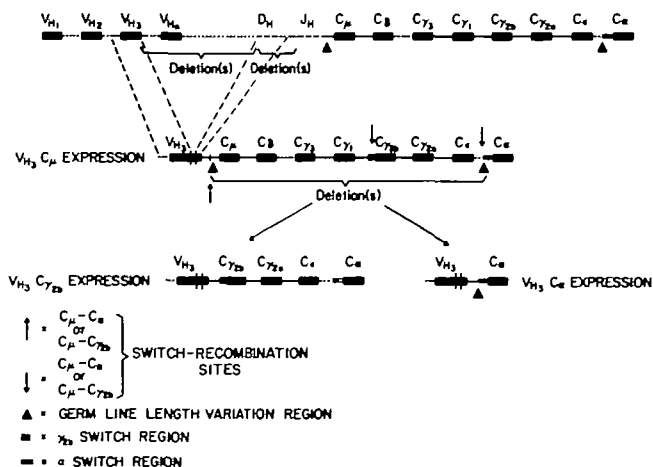

Figure 1. DNA recombination events associated with  $C_H$  gene expression.

two  $\gamma 1$  (2,5,6,10) and two  $\alpha$  myelomas (5), tandemly repetitious DNA sequences located 5' of these  $C_H$  genes have been implicated in the switching mechanism and have been termed S regions (2). However, sequence analysis of the expressed  $\gamma 2b$  gene of MOPC 141 has not revealed the presence of repetitive DNA sequences at the site of switch-recombination (3,11). The apparent lack of significant nucleotide sequence homology between the  $\gamma 1$  and  $\alpha$  type acceptor S regions and their lack of homology with  $S_\mu$  donor sites has prompted one group of investigators to propose a model for  $C_H$  class specific switch-recombinases (5). However, additional complications in the switch mechanism arise when one considers that no  $C_H$  class specificity appears to exist for determining the  $S_\mu$  donor sites. Recently, more extensive DNA sequence analysis of the 5' flanking region of the germ line  $\gamma 2b$  gene and a rearranged  $\gamma 2b$  gene has revealed a rather homogeneous set of 49 base pair repeats which are located  $\sim 0.8$ -4.1 kbp 5' of the MOPC 141  $\gamma 2b$  gene recombination site (12). This repetitive sequence would appear to share extensive sequence similarities with other  $S_\gamma$  sequences and more limited homology with the shorter, tandemly repetitious sequences which define the majority of  $S_\mu$  (12). These findings have led these workers to suggest that  $C_H$  gene switching may be a consequence of homologous recombination between short common sequences found 5' of all  $C_H$  genes (12).

We have previously shown that DNA sequences associated with or adjacent

to  $S_{\mu}$  and  $S_{\alpha}$  regions possess extensive sequence homology. These sequences delete during cloning in bacteria and undergo length variation in the germ lines of inbred and wild mice as well as DNA rearrangements in a variety of mouse myelomas (13,14). These 5' flanking  $C_{\mu}$  and  $C_{\alpha}$  sequences have been found to be highly conserved between mice and humans further implicating them as important components of the  $C_H$  gene switch (15,16).

In order to gain further insight into the molecular mechanism of the  $C_H$  gene switch, we have herein undertaken a study of the  $\gamma 2b$  genes of the MPC-11 cell line (a  $\gamma 2b$  producing Balb/c plasmacytoma) (17). MPC-11 has proven to be a most interesting cell line with regards to the stability and expression of both the light and heavy chain Ig polypeptides (18, 19). MPC-11 cells have been shown to spontaneously lose the ability to produce  $\gamma 2b$  heavy chains at a rate of  $1 \times 10^{-3}$ /cell/generation (18,20) and also produce a unique light chain fragment mRNA (21-25). Upon mutagenesis these cells are capable of generating variants which produce either shorter  $\gamma 2b$  chains (26), apparently complete  $\gamma 2a$  chains (27-29) or  $\gamma 2b$ - $\gamma 2a$  hybrid polypeptides (30,31). In this report, we describe the structures of two rearranged  $\gamma 2b$  genes present in different copy numbers in MPC-11 cells. We provide formal evidence that recombination within S regions can yield both nonproductive as well as productive  $C_H$  genes suggesting a random selection process for  $C_H$  gene expression. Switch-recombination may be indirectly facilitated by short DNA sequences (GAGCT & GGGGT) which are a large portion of the  $S_{\mu}$  repetitive region but a much smaller component of the  $S_{\gamma 2b}$  repeat. However, the presence of a well conserved DNA sequence (AGGTTG) found either close to the 5' side of all  $C_H$  donor or acceptor switch sites and the general lack of conservation of the Balb/c  $S_{\gamma 2b}$  repeat in a different mouse species suggests to us that other sequence specific components may also be necessary for proper  $C_H$  gene switching. The  $\gamma 2b$  gene which we have identified as the expressed gene in MPC-11 cells has recently been observed to undergo a DNA rearrangement event in several  $\gamma 2a$  producing MPC-11 switch variants derived by mutagenesis (32).

#### EXPERIMENTAL PROCEDURES

##### DNA Isolation, Cloning and Southern Blotting

DNA isolations, bacteriophage cloning, plasmid subcloning, restriction enzyme digestions and the preparation of radiolabeled probes for blotting experiments were all performed as previously described (13).

Southern transfers and genomic blot hybridizations were performed essentially as described (13,33). However, some genomic blot hybridizations were

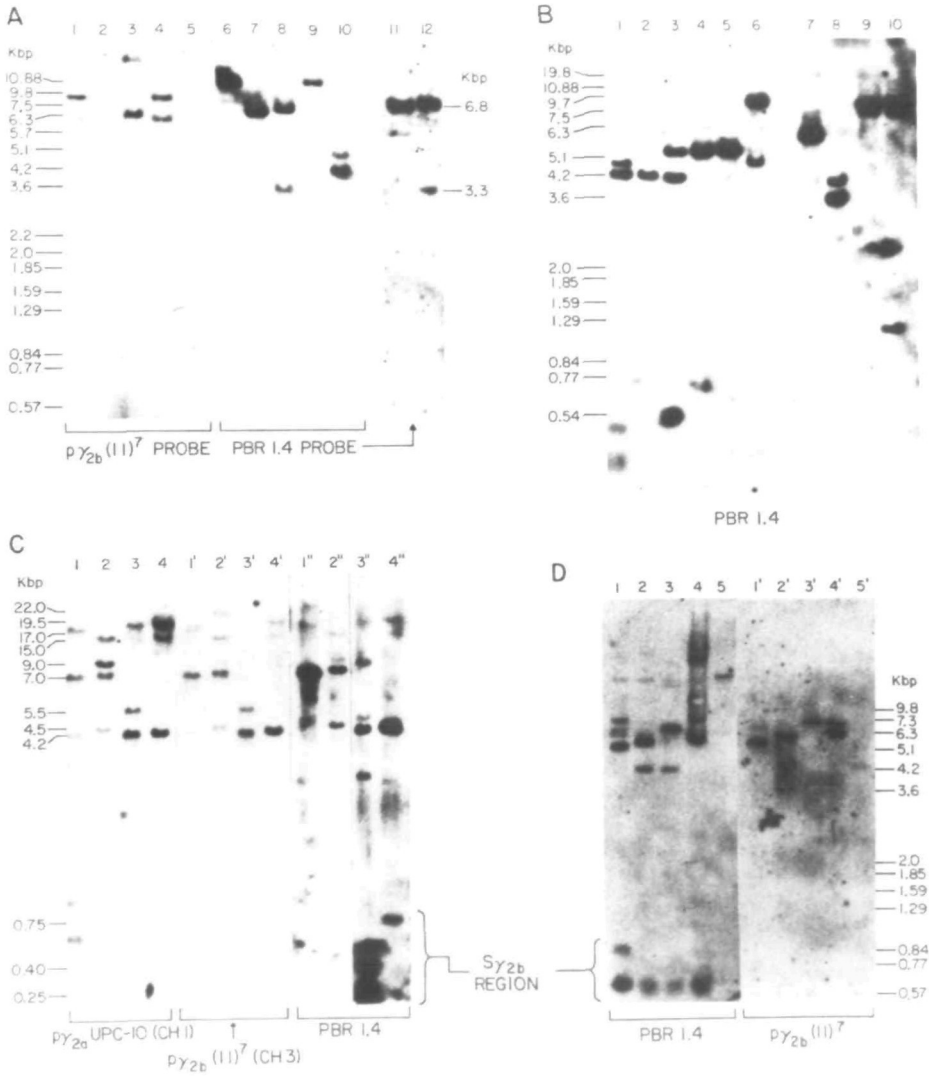

Figure 2. Comparative Restriction Digestions of MPC-11 and Mouse Liver DNAs Hybridized with  $\gamma_{2b}$ ,  $\gamma_{2a}$  and  $S_{\gamma 2b}$  Probes.

(A) Southern transfers of 0.8% agarose gel-fractionated Balb/c J liver DNA digested with HindIII (Lanes 1 & 6), SacI (Lanes 2 & 7) and EcoRI (Lane 11) or MPC-11 DNA digested with HindIII (Lanes 4 & 9), SacI (Lanes 5 & 10) and EcoRI (Lanes 3, 8 & 12) were either hybridized to  $\gamma_{2b}(11)^7$  probe (Lanes 1-5) or pBR1.4 probe (Lanes 6-12). The weak 6.3 kbp HindIII band which hybridizes to the  $\gamma_{2b}(11)^7$  probe in both Balb/c (Lane 1) and MPC-11 (Lane 4) samples

is due to the  $\gamma$ 2a gene. A side by side comparison of the EcoRI fragments detected in Balb/c and MPC-11 DNAs by the pBR1.4 probe is provided in Lanes 11 and 12 to clearly indicate the presence of a unique, weakly hybridizing  $\gamma$ 2b gene ( $\sim$ 3.2 kbp) in the MPC-11 sample. pBR1.4 positive bands of even weaker intensity in Lanes 6-9 are presumably due to cross-hybridization with other  $S_{\gamma}$  regions.

(B) Balb/c and MPC-11 DNAs were digested respectively with KpnI (Lanes 1 & 2), BglII (Lanes 3 & 4), BamHI (Lanes 5 & 6), SacI (Lanes 7 & 8) and HindIII (Lanes 9 & 10) and hybridized to pBR1.4.

(C) BglI and KpnI digestions of Balb/c DNA (Lanes 1, 1' and 1'' for BglI, Lanes 3 and 3' and 3'' for KpnI) and MPC-11 DNA (Lanes 2, 2' and 2'' for BglI and Lanes 4, 4' and 4'' for KpnI) were hybridized to either a  $\gamma$ 2a  $C_{H1}$  domain probe (Lanes 1-4), a  $\gamma$ 2b  $C_{H3}$  domain probe (Lanes 1'-4') or the  $S_{\gamma}2b$  probe, pBR1.4 (Lanes 1''-4''). The  $\gamma$ 2a  $C_{H1}$  probe was prepared by restriction digestion of a full length cDNA clone of the UPC-10 myeloma  $\gamma$ 2a mRNA (52) and the  $\gamma$ 2b  $C_{H3}$  probe was obtained in a similar manner from the  $\gamma$ 2b(11) sequence (37). Nitrocellulose filters were washed in 3xSSC 0.1% SDS for 1-2 hours prior to autoradiography.

(D) BglII digestions of liver DNAs of *M. domesticus*, Balb/c J, NZB, C57Bl/6J and *M. pahari* were hybridized to the pBR1.4 probe (Lanes 1-5) or the  $\gamma$ 2b(11) probe (Lanes 1'-5') respectively. The intensely hybridizing bands in Lanes 1-4 correspond to portions of the  $S_{\gamma}2b$  repeat (see text) and the weaker bands of high molecular weight are due to  $S_{\gamma}$  cross-hybridization. The 3'  $S_{\gamma}2b$  fragments are shown to hybridize to the  $C_{\gamma}2b$  probe in Lanes 1'-4'. Only one high molecular weight band is observed with pBR1.4 for *M. pahari* DNA (Lane 5) while the *M. pahari*  $\gamma$ 2b gene equivalent would appear to be a weak band of  $\sim$ 4.3 kbp (Lane 5').

carried out at 65°C for 16-24 hours in a solution with the following ingredients: 3xSSC, 10% dextran sulphate (pharmacia), 0.1% each of polyvinylpyrrolidone 360, ficoll 400 and bovine serum albumin (Sigma Fraction V, #A-4503), 0.1% SDS, 5mM EDTA, 10  $\mu$ g/ml poly rA, 50  $\mu$ g/ml of sheared salmon sperm DNA and 1-2 x 10<sup>6</sup> cpm/ml of probe) (33) (B. Van Ness and P. Brodeur, personal communication). Stringent filter washes were performed as described subsequent to autoradiography with intensifier screens (13).

#### DNA Sequencing

DNA sequencing was performed on 0.3mm x 40cm or 90cm long gels (for fragments >250 bp in length) (34) essentially as described (35) with one slight modification. Piperidine was removed by ethanol precipitation as opposed to repeated lyophilizations in water. Briefly, piperidine was removed by precipitation in 0.3M NaAc pH 7.0 with 2.5 parts of 100% ethanol, precipitates were resuspended in 200  $\lambda$  of 0.3M NaAc pH 7.0, reprecipitated and washed in 70% ethanol and finally desiccated prior to resuspension in formamide-dye mix

for loading sequencing gels. C and C+T reactions were resuspended and reprecipitated twice. Sequencing ladders were observed to consist of sharper bands allowing easier reading of the DNA sequences (M. Krystal, personal communication).

#### Genomic Southern Blots Reveal Multiple $\gamma$ 2b Gene Rearrangements in MPC-11 Cells

In order to obtain a clear, overall picture of the contextual arrangement of the  $\gamma$ 2b and  $\gamma$ 2a genes in MPC-11 cells, we initiated these studies by analyzing Southern blots of MPC-11 DNA with  $C_{\gamma 2b}$  (22,37),  $C_{\gamma 2a}$  (52),  $S_{\gamma 2b}$  and  $J_H$  DNA probes. Data obtained with SacI and BglII clearly demonstrated the presence of rearranged MPC-11  $\gamma$ 2b genes using either a  $C_{\gamma 2b}$  probe ( $\text{py}2b(11)^7$ ) (23,37) or a  $\gamma$ 2a  $C_H1$  probe (52) with no maintenance of a germ line  $\gamma$ 2b sequence (see Figures 2A and 2C). However, EcoRI, HindIII and BglII digestions gave no evidence of  $\gamma$ 2b gene rearrangements (Figure 2A). These results indicate that the  $\gamma$ 2b gene rearrangements in MPC-11 cells occur considerably 5' (i.e., at least 1.5 kbp) of the recombination site observed for the MOPC 141  $\gamma$ 2b gene which was found to be  $\sim 1.0$  kbp 5' of  $C_{\gamma 2b}$  (3,11). Detailed restriction enzyme maps of the rearranged MPC-11  $\gamma$ 2b genes were prepared by resorting to a 5'  $C_{\gamma 2b}$  switch region probe (see origin of pBR1.4 in Figure 6, genomic blot data in Figure 2A-C and  $\gamma$ 2b gene restriction maps in Figure 3). These experiments clearly indicate that: (1) two types of rearranged  $\gamma$ 2b genes are present in MPC-11 cells, (2) the  $\gamma$ 2b genes exist in different copy numbers per cell giving rise to both strongly and weakly hybridizing bands unique to MPC-11 cells and (3) the sites of rearrangement are  $\sim 2.5$  kbp 5' of  $C_{\gamma 2b}$  and probably less than 400 bp apart.

#### MPC-11 Cells Contain Only One Rearranged $J_H$ Region

In order to attempt to determine which of the rearranged  $\gamma$ 2b genes might be the sequence expressed in MPC-11 cells, we used two subcloned genomic sequences of the Balb/c germ line  $J_H$  region (i.e.,  $\text{pj}_0$  and  $\text{pj}_{11}$  in Figure 4) (13,14) as probes for our genomic blot studies. These experiments (see Figure 5A-C) allow us to draw the following conclusions: (1) no germ line  $J_H$  arrangement exists in MPC-11 cells, (2) only one rearranged  $J_H$  sequence exists in MPC-11 cells, and (3) HindIII and BamHI data both show that  $J_{H1}$  is deleted with  $J_{H2}$  presumably undergoing a recombination event with the MPC-11  $V_H$  gene. Indeed, the nucleotide sequence of the  $V_H$  region of the MPC-11  $\gamma$ 2b mRNA has revealed that  $J_{H2}$  is used in the recombination event (39). When MPC-11 DNA is cut with BamHI, the pBR1.4 band corresponding to the  $\gamma$ 2b weakly hybridizing gene and one of the  $J_H$  hybridizing bands are observed to co-migrate (Figure 2B

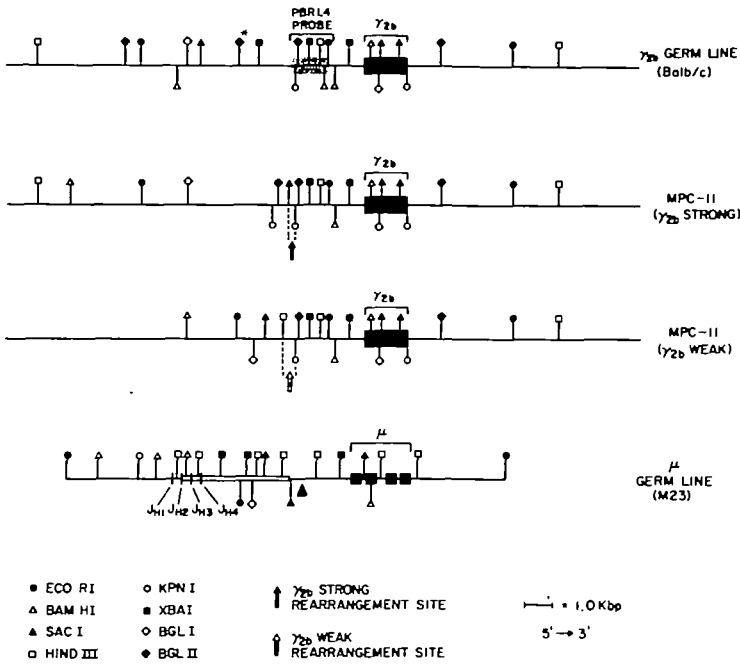

Figure 3. Genomic Restriction Maps of a  $\gamma_{2b}$  Strongly Hybridizing Gene and A  $\gamma_{2b}$  Weakly Hybridizing Gene in Comparison to Maps of the Balb/c Germ Line  $\gamma_{2b}$  and  $\mu$  genes.

and 5A). No J<sub>H</sub> hybridizing bands appear to co-migrate with pBRL.4 bands attributable to the  $\gamma_{2b}$  strongly hybridizing gene. Unfortunately, most of the restriction enzymes used (i.e., except for BamHI) are probably cutting

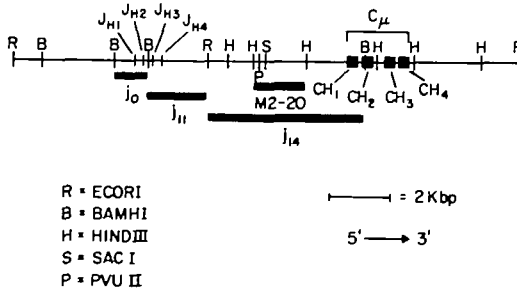

Figure 4. Restriction map of C <sub>$\mu$</sub>  Flanking Sequences and Location of Sub-cloned hybridization probes. Restriction sites only relevant to the text are indicated.

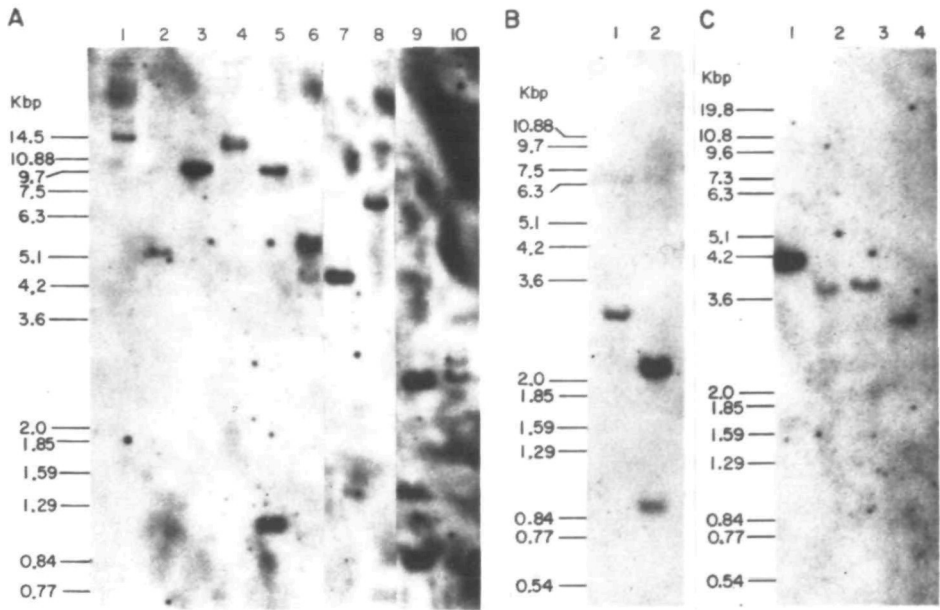

Figure 5. Southern transfers of restriction digests of Balb/c J liver and MPC-11 DNAs hybridized to the entire Balb/c  $J_H$  region (p $j_0$  + p $j_{11}$  probes in Figure 4).

(A) Balb/c J and MPC-11 DNAs digested with KpnI (Lanes 1 & 2), BglII (Lanes 3 & 4), BamHI (Lanes 5 & 6), SacI (Lanes 7 & 8) and HindIII (Lanes 9 & 10) respectively.

(B) MPC-11 DNA digested with EcoRI (Lane 1) and XbaI (Lane 2).

(C) Balb/c J and MPC-11 DNAs doubly digested with KpnI + BglII (Lanes 1 & 2) or KpnI + EcoRI (Lanes 3 & 4) respectively.

in between the pBR1.4 hybridizing region and the  $J_H$  region in the expressed  $\gamma_2b$  gene. This conclusion is substantiated by an extensive analysis of  $\gamma_2b$  genomic clones.

Isolation of Two Rearranged  $\gamma_2b$  Genes from MPC-11 Cells:

Genomic Clones of an Abortively Rearranged  $\gamma_2b$  Gene

We then set about to obtain genomic clones corresponding to the two types of rearranged  $\gamma_2b$  genes and initially screened a partial EcoRI library of MPC-11 DNA prepared in Charon 4A phage (40) with our  $\gamma_2b$  gene specific probes. Two genomic clones containing overlapping sequences (M68 and C62 in Figure 6) were obtained with the pBR1.4 probe from  $\sim 6 \times 10^5$  phages of the unamplified MPC-11 gene library. The structures of this first set of clones completely



agree with the genomic restriction map of the  $\gamma_{2b}$  strongly hybridizing gene. A comparison of the restriction map of the MPC-11  $\gamma_{2b}$  gene to those of both a  $\gamma_{2b}$  and a  $\gamma_3$  gene isolated from a Balb/c sperm DNA library indicated that the 5' flanking sequences of the  $\gamma_3$  gene and those of the  $\gamma_{2b}$  gene have recombined generating the MPC-11  $\gamma_{2b}$  strongly hybridizing gene (Figure 6). Hybridization experiments performed with the pBR1.4 probe, a 5' flanking  $\gamma_3$  gene probe ( $p\gamma_3$ -2.7) and the rearranged EcoRI fragment present in the MPC-11 C62 clone (i.e., the C62-6.8 probe) all support the idea that this rearrangement was a result of a homologous DNA recombination event occurring between  $S_{\gamma_3}$  and  $S_{\gamma_{2b}}$  regions. Genomic Southern blot experiments performed with a  $\gamma_3$  gene probe ( $\gamma_3$ -6.0) in addition to the above hybridization reagents show that the  $\gamma_3$  gene is deleted from MPC-11 DNA (data not shown). A comparison of sequences flanking the Balb/c  $\gamma_3$  gene (SL51 & SL14) with those of the  $\gamma_{2b}$  strongly hybridizing gene of MPC-11 (C62 & M68) clearly indicates that at least  $\sim 12$  kbp of DNA 5' of the recombination site is directly 5' of the germ

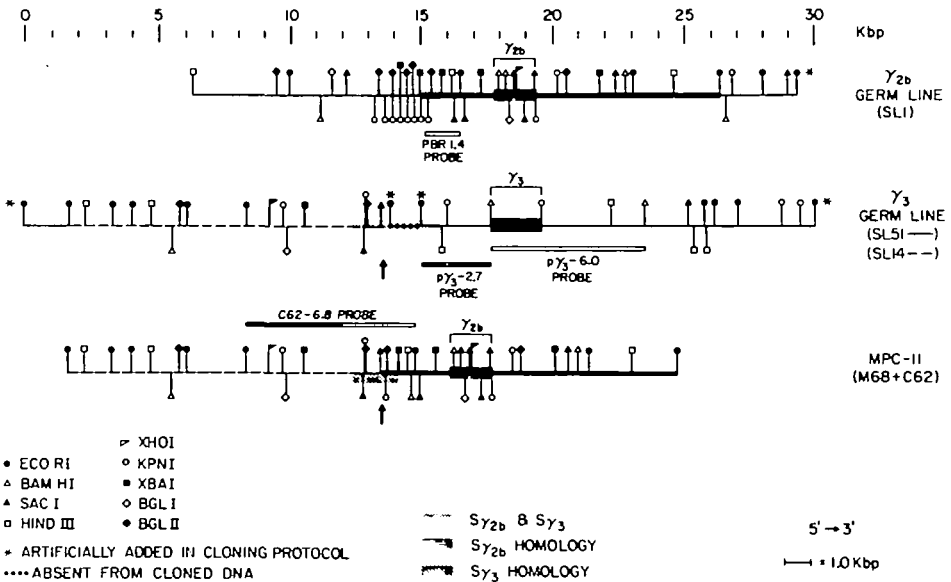

Figure 6. " $S_{\gamma_3}$  and  $S_{\gamma_{2b}}$  recombination generates a non-functionally rearranged  $\gamma_{2b}$  gene in MPC-11 cells." The pBR1.4 probe was originally obtained as a 1.4 kbp EcoRI fragment from a Balb/c mouse sperm  $\gamma_{2b}$  genomic clone (SL59) and was subcloned into pBR322. A small portion ( $\sim 0.9$  kbp) of the 5' flanking  $\gamma_3$  region (.....) was not obtained in our two  $\gamma_3$  clones (SL14 and SL51). These clones were linked by comparison with other published data (53).

line  $\gamma 3$  gene. No sequences in our  $\gamma 2b$  strongly hybridizing gene clones hybridize to either  $J_H$  or  $S_\mu$  probes (data not shown). These results would strongly argue that this MPC-11  $\gamma 2b$  gene is an abortive rearrangement apparently due to a single recombination event between  $S_{\gamma 3}$  and  $S_{\gamma 2b}$ . Our findings extend the observations of other workers who have isolated and determined the DNA sequence of the site of recombination of a rearranged  $\gamma 2b$  gene in MPC-11 cells (12).

#### Genomic Clones of the Expressed $\gamma 2b$ Gene:

In order to obtain a clone corresponding to the MPC-11  $\gamma 2b$  weakly hybridizing gene, we screened  $\sim 2 \times 10^6$  plaques of the MPC-11 library with our  $pj_{11}$  probe (Figure 4) (13,14) and obtained two positive clones. Upon plaque purification, both of these clones were also found to hybridize to our  $pj_0$ , pBR1.4,  $p\gamma 2b(11)$ <sup>7</sup> and  $S_\mu$  probes as anticipated for a functionally rearranged  $\gamma 2b$  gene. Restriction digestions indicated that these clones are identical. A complete restriction map of the expressed  $\gamma 2b$  genomic clone (RBL 216) is shown in comparison to M23 (a germ line Balb/c  $\mu$  gene clone) and SL1 (a germ line Balb/c  $\gamma 2b$  gene clone) in Figure 9.

Southern blots performed with the  $pj_0$  and  $pj_{11}$  probes (13,14) allowed us to position the location of the MPC-11  $V_H$  gene in RBL 216 (see Figure 7A & B). As anticipated from our genomic Southern blots  $J_{H2}$  is utilized by the MPC-11  $V_H$  gene. We confirmed that the MPC-11  $V_H$  sequence was involved in this recombination event by comparing the pattern of restriction sites 5' of  $J_{H2}$  in RBL 216 with those anticipated from the nucleotide sequence of an MPC-11  $V_H$  cDNA clone (39) (see Figure 9). This experiment was performed by purifying a 2.1 kbp HindIII fragment from RBL 216 which was expected to contain the  $V_H$  region,  $J_{H2}$ , and  $J_{H3}$  as well as some additional 5' and 3' flanking sequences. Since BamHI cuts between  $J_{H2}$  and  $J_{H3}$  (13,14) and our  $pj_0$  probe ( $J_{H1}$  & 2') can only hybridize 5' of this BamHI site, double digestions performed on this 2.1 kbp HindIII piece with BamHI and other enzymes allowed us to specifically map restriction sites 5' of this BamHI site by hybridizing with our  $pj_0$  probe. These results confirm that the  $V_H$  sequence of the MPC-11  $\gamma 2b$  mRNA is 5' of  $J_{H2}$  in this  $\gamma 2b$  genomic clone (RBL 216) which corresponds to our  $\gamma 2b$  weakly hybridizing gene.

Southern blots performed with  $S_\mu$  ( $pj_{14}$  and  $pM2_{20}$  in Figure 4) and  $S_{\gamma 2b}$  (pBR1.4) probes allowed us to position the switch-recombination site in this expressed  $\gamma 2b$  genomic clone. This switch event occurred between the 5' HindIII site of the  $M2_{20}$  sequence ( $S_\mu$ ) and the solitary KpnI site in pBR1.4 ( $S_{\gamma 2b}$ ) (see Figures 4, 7C and 8A&B). Most of the  $S_\mu$  region is deleted in the

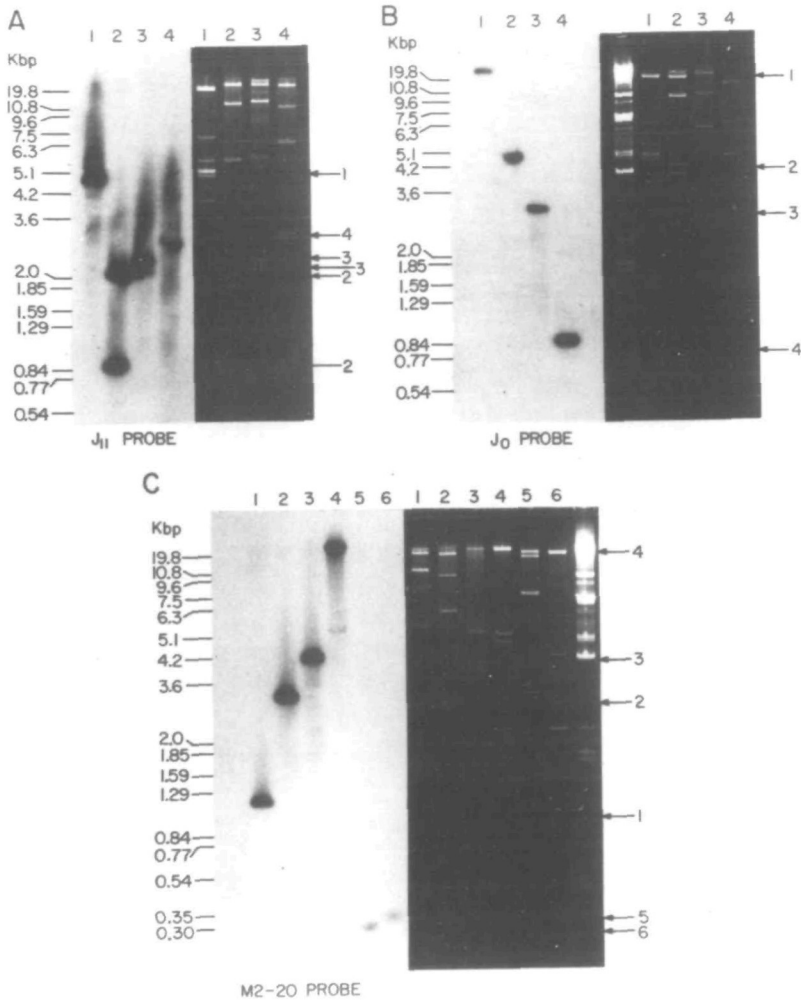

Figure 7. Analysis of Southern transfers of restriction enzyme digestions of the expressed  $\gamma 2b$  genomic clone (RBL 216).

(A) RBL 216 DNA digested with  $Bam$ HI,  $Xba$ I,  $Hind$ III and  $Eco$ RI (Lanes 1-4 respectively) hybridized to the  $pj_{11}$  probe.

(B) RBL 216 DNA digested with  $Bam$ HI,  $Kpn$ I,  $Eco$ RI and  $Bam$ HI +  $Eco$ RI (Lanes 1-4 respectively) hybridized to the  $pj_0$  probe.

(C) RBL 216 DNA digested with  $Hind$ III,  $Eco$ RI,  $Sac$ I,  $Bgl$ II,  $Kpn$ I +  $Hind$ III and  $Bgl$ II +  $Hind$ III (Lanes 1-6 respectively) hybridized to the  $pM2_{20}$  probe. The origins of the probes are shown in Figures 4 and 6. Pictures of the ethidium stained gels are shown for comparison.

switch as shown by the markedly reduced hybridization response of the HindIII-KpnI recombination fragment with the M2<sub>20</sub> probe as compared to the M2<sub>20</sub> sequence itself (see Figure 8A).

S<sub>μ</sub> Switches Directly to S<sub>γ2b</sub> to Express the MPC-11 γ2b Gene

DNA sequence analysis (35) was performed on a portion of the subcloned pBR1.4 sequence and on the 275 bp HindIII-KpnI recombination piece within RBL 216 (see Figure 9 for sequencing strategies). These sequences are shown in comparison to the S<sub>μ</sub> region (3) to precisely position the RBL 216 recombination site for the expressed gene. As shown in Figure 10, the μ→γ2b switch occurred 6 nucleotides 5' of the KpnI site within our pBR1.4 probe and after this point, the sequence is essentially in complete agreement with

Downloaded from https://academic.oup.com/nar/article/10/2/611/2381294 by guest on 20 April 2024

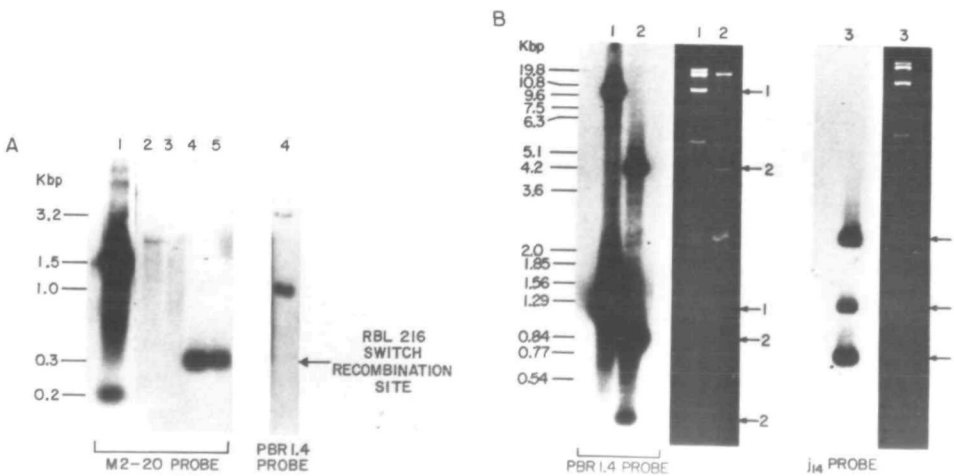

Figure 8. Restriction Digestion Analysis of the Expressed γ2b Gene (RBL 216) Recombination Site.

(A) Southern transfers of pM2<sub>20</sub> insert digested with PvuII (Lane 1), pBR1.4 digested with KpnI + EcoRI (Lane 2) or PvuII + EcoRI (Lane 3) and RBL 216 DNA digested with either KpnI + HindIII (Lanes 4 & 4') or KpnI + HindIII + PvuII (Lane 5) were hybridized to either pM2<sub>20</sub> probe (Lane 1-5) or pBR1.4 probe (Lane 4'). Weakly hybridizing bands in Lanes 2 and 3 are due to contaminating pBR322 sequences in the M2<sub>20</sub> insert probe recognizing their homologous sequences in the pBR1.4 plasmid.

(B) RBL 216 digested with HindIII (Lanes 1 & 3) or HindIII + BglII was hybridized to either pBR1.4 (Lanes 1 & 2) or pj<sub>14</sub> (Lane 3). The pBR1.4 blot is somewhat overexposed to allow one to clearly discern the 325 bp recombination fragment in Lane 2. The overexposed bands are 1.3 kbp and 0.80 kbp in Lanes 1 and 2 respectively. Profiles of ethidium stained gels are shown for comparison.

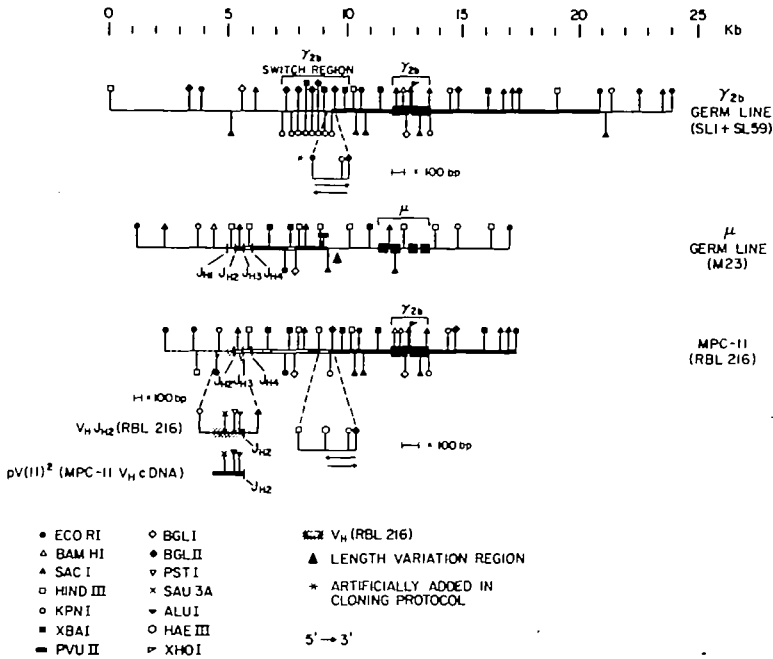

Figure 9. Restriction Maps of the Functionally Rearranged MPC-11  $\gamma_{2b}$  Gene, and Balb/c Germ Line  $\gamma_{2b}$  and  $\mu$  Genes. Arrows indicate the DNA sequencing strategies performed on portions of the cloned DNAs. The region of the  $\gamma_{2b}$  germ line DNA chosen for DNA sequencing corresponds to the 5' 235 nucleotides of the pBR1.4 sequence. pBR1.4 is a subclone of a 1.4 kbp EcoRI fragment originally obtained from a Balb/c sperm  $\gamma_{2b}$  genomic clone, SL59. The restriction sites of the MPC-11  $V_H$  cDNA clone, pv(11)<sup>2</sup>, were obtained from the published DNA sequence (39).

the corresponding  $S_\mu$  region (3). Relative to the  $S_\mu$  region, the site of recombination is 52 nucleotides 5' of the SacI site in M2<sub>20</sub> (Fig. 4). This is considerably 5' of the highly repetitious, genetically unstable sequence component within  $S_\mu$  (3,13,14,41).

MPC-11 Cells Possess Other Rearranged  $C_H$  Genes

We have found evidence for at least two types of rearranged  $\gamma_{2a}$  genes (see Figure 2C), two rearranged  $\alpha$  genes (14) and one rearranged  $\mu$  gene (14) (Greenberg, R. and Marcu, K., in preparation) in MPC-11 cells. DNA rearrangement events have occurred both 5' and 3' of the MPC-11  $\gamma_{2a}$  genes (see Figure 2C). BglII appears to cut in both  $C_H$  hinge regions (36,42,43) but no where in between the genes thereby generating a large 17 kbp DNA fragment con-

Downloaded from https://academic.oup.com/nar/article/10/2/611/2381294 by guest on 20 April 2024

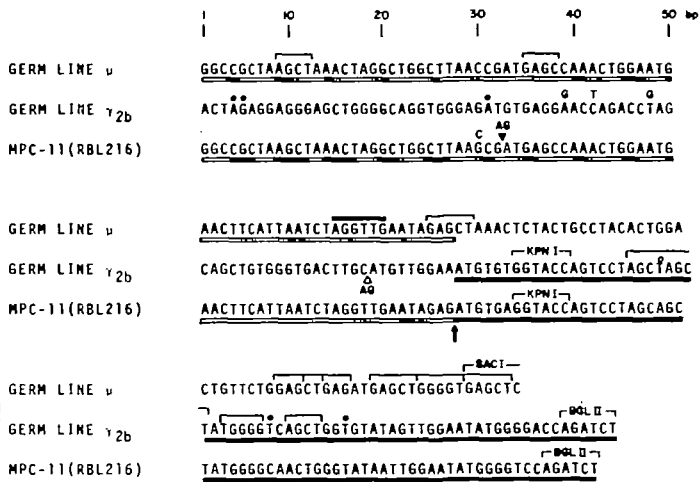

Figure 10. DNA sequences around the vicinity of the RBL 216 recombination site are compared to corresponding regions of the germ line  $\mu$  and  $\gamma_{2b}$  sequences. Short common sequences are indicated by brackets, a prevalent sequence (AGGTTG) uniquely found 5' of this and other switch sites is denoted by two solid overhead lines (—). A sequence possessing a 5/6 match with AGGTTG (i.e., ATGTTG) is also seen four nucleotides 5' of the  $S_{\gamma_{2b}}$  site. The independent  $S_{\gamma_{2b}}$  site of the non-functional MPC-11  $\gamma_{2b}$  gene is exactly 251 nucleotides 5' of this functional  $S_{\gamma_{2b}}$  site (see Figure 11) (12). Differences with other published work (12) are indicated above and below the sequences; nucleotides with overhead circles are single base insertions present in our sequence, nucleotides below the sequences are insertions present in other published work, the AG dinucleotide above line three is an insertion in our sequence in comparison to line one. The  $\mu$  germ line sequence is taken from other published data (3).

taining part of the coding regions of both genes and all their intervening DNA. As expected, this 17 kbp fragment in Balb/c DNA was observed to uniquely hybridize with a  $\gamma_{2b}$   $C_{H3}$  probe, a  $\gamma_{2a}$   $C_{H1}$  probe and to an  $S_{\gamma_{2b}}$  probe (pBR1.4) as shown in Figure 2C. The  $S_{\gamma_{2b}}$  probe weakly hybridizes to this 17 kbp fragment presumably due to homology with  $S_{\gamma_{2a}}$  sequences. Upon BglII digestion of MPC-11 DNA, four unique bands not present in the Balb/c control are observed to hybridize to both  $\gamma_{2a}$   $C_{H1}$  and pBR1.4 probes. The lower two bands correspond to the two rearranged  $\gamma_{2b}$  genes (Figure 3) and the weaker hybridization of the upper two bands with pBR1.4 suggests that these are  $\gamma_{2a}$  genes. These rearranged  $\gamma_{2a}$  genes are also clearly visible as two high molecular weight bands upon KpnI digestion.

DISCUSSION

We have shown that the  $\gamma 2b$  expressing MPC-11 myeloma possesses two  $\gamma 2b$  genes which have rearranged via switch-recombination sequences. One gene, which has rearranged via an  $S_{\mu} \rightarrow S_{\gamma 2b}$  event contains the appropriate  $V_H$  and  $J_H$  sequences for the MPC-11  $\gamma 2b$  mRNA (39) while the other gene involved an  $S_{\gamma 3} \rightarrow S_{\gamma 2b}$  event with no evidence for the involvement of  $S_{\mu}$ . The overall size of our genomic clone corresponding to the functionally rearranged  $\gamma 2b$  gene (i.e., RBL 216 in Figure 9) is approximately 10 kbp from the beginning of the  $V_H$  gene to the end of the  $C_{\gamma 2b}$  gene agreeing well with an estimated size of 11.5 kb for the high molecular weight initial transcription unit of the MPC-11  $\gamma 2b$  gene (22). The functionally rearranged gene would also appear to possess a lower copy number per cell in comparison to the non-functional  $\gamma 2b$  gene (i.e., 1 as opposed to 2-3). This is not difficult to understand when one considers that MPC-11 cells are polyploid containing  $\sim 65$  chromosomes (Margulies, D.H., unpublished results).

A rearranged  $\gamma 2b$  gene corresponding to our  $\gamma 2b$  strongly hybridizing gene (unexpressed) has been found to be created by a recombination event within a set of homologous, 49 bp, repetitious DNA sequences located 5' of the  $\gamma 3$  and  $\gamma 2b$  genes (12). Since these authors only observed one  $\gamma 2b$  gene in Southern blots of MPC-11 DNA, they assumed this to be the functional  $\gamma 2b$  gene and that the DNA recombination event had occurred between repetitive  $S_{\gamma}$  regions (12). As shown in Figure 6, neither  $V_H$ ,  $J_H$  nor  $S_{\mu}$  sequences are found 12 kbp 5' of our  $\gamma 2b$  strongly hybridizing gene clones. It is known that MPC-11 cells are somewhat unstable and will lose the ability to produce heavy chains with a frequency of  $10^{-3}$ /cell/generation (18,20). Unfortunately, it is not known whether this is indicative of either chromosome instability in these polyploid cells,  $\gamma 2b$  gene deletion or a defect in gene expression (20). However, MPC-11 cells which have been repeatedly passaged in tissue culture give reproducibly low yields of  $\gamma 2b$  mRNA (44) (Marcu, K. and Valbuena, O., unpublished results). In agreement with the results of this paper, an MPC-11  $\gamma 2b$  gene was recently detected by Southern blotting which shares some features in common with our functionally rearranged  $\gamma 2b$  genomic clone (RBL 216) (45).

What are the Precise Molecular Requirements for  $C_H$  Gene Switching?

Unlike  $V_L-J_L$  or  $V_H-D_H-J_H$  recombination events which appear to require two small blocks of evolutionarily conserved nucleotides, that are separated by a defined length of spacer DNA, close to the site of recombination (3,4, 46,47),  $C_H$  gene switch-recombination has not been found to require a specific recombination site. This may simply be a reflection of the accuracy required for

proper  $C_H$  switching which occurs within the intervening sequences 5' of  $C_H$  genes and therefore does not create new coding information as in  $V_L$  or  $V_H$  gene formation. However, it has been proposed that  $C_H$  switching is either facilitated by homologous recombination between short, tandemly repetitious DNA sequences located 5' of all  $C_H$  genes (2,12,41,48) or by  $C_H$  class specific recombinases which recognize different repetitive sequences unique to individual  $C_H$  genes (5).

A comparison of the  $S_\mu$  recombination site used by the MPC-11  $\gamma_{2b}$  gene with the  $S_\mu$  donor sites and some of the S acceptor sites of other rearranged  $C_H$  genes is shown in Figure 11. We have termed these switch regions Donor ( $S_\mu$ ) and Acceptor (all other  $S_H$  regions) to emphasize that all functional switch events initiate in the  $S_\mu$  region. The precise  $S_\mu$  recombination sites of all these  $C_H$  genes are different. The only common feature is the presence of a well conserved short sequence (AGGTTG) positioned either 5' of the  $S_\mu$  switch-recombination donor (D) site or adjacent to the appropriate  $C_H$  S acceptor (A) site. This sequence is perfectly conserved within 8 and 11 nucleotides 5' of the  $S_\mu$  sites in MPC-11 and MOPC 603 (5) respectively. A

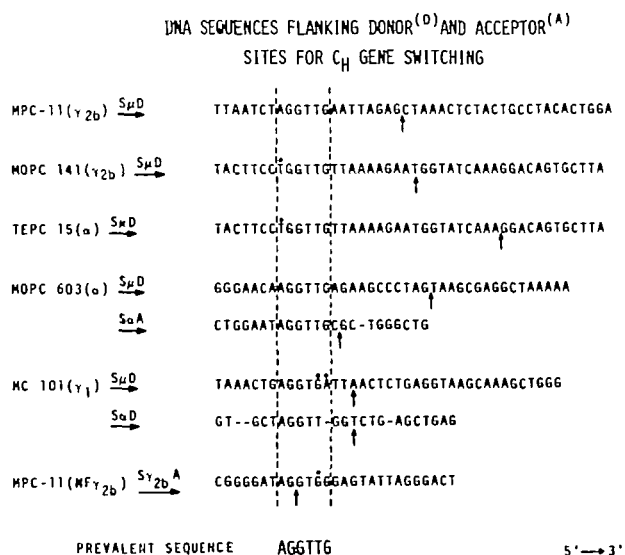

Figure 11. Switch sites in the vicinity of the  $S_\mu$  region (donor switch region) and switch sites in the vicinity of the  $S_\alpha$  and  $S_{\gamma_{2b}}$  regions (acceptor switch regions) are compared and shown to possess a prevalent sequence 5' of the switch-recombination sites. Arrows indicate the sites of recombination. MOPC 141 (3,11), MOPC 603 and TEPC 15 (5), MC101 (5,6), MPC-11 non-functional (NF)  $\gamma_{2b}$  gene (12), MPC-11  $\gamma_{2b}$  (Figure 10 of this paper).



sequence agreeing in 5 out of 6 positions is present 10 and 19 nucleotides 5' of the  $S_{\mu}$  sites in MOPC 141 (3,11) and TEPC 15 (5) respectively. The weakest match is for the MOPC 101  $\gamma 1$  gene (6) in which only 4 nucleotides of the sequence are present 5 nucleotides 5' of the  $S_{\mu}$  site. However, a perfect match for the sequence is found 2 nucleotides 5' of the  $S_{\alpha}$  donor sequence which actually switches to  $S_{\gamma 1}$  in MC-101 (6). As indicated above, the  $S_{\mu}$  site utilized by the direct switch to  $S_{\alpha}$  in TEPC 15 is located farthest from this prevalent sequence (i.e., 19 nucleotides) but two sequences with 5 out of 6 base pairs in agreement with AGGTTG are also found 13 nucleotides 5' and 2 nucleotides 3' of the TEPC 15  $S_{\alpha}$  acceptor site (5). This sequence is not observed 5' of the  $S_{\mu}$  site used in a direct switch to the  $C_{\alpha}$  gene in the Balb/c J558 myeloma but a 5/6 match with AGGTTG is seen 2 nucleotides 5' of the  $S_{\alpha}$  acceptor site (Harris, L. and Marcu, K., unpublished results). Interestingly, a similar sequence constitutes the  $S_{\gamma 2b}$  recombination site in the non-functional MPC-11  $\gamma 2b$  strong gene (see Figure 11) (12). In addition, the  $S_{\mu}$  site utilized for the switch to  $C_{\epsilon}$  in an IgE hybridoma would appear to be quite close to the  $S_{\mu}$  site of the MOPC 603  $C_{\alpha}$  gene (41).

Surprisingly, the sequence AGGTTG is not prevalent in the  $S_{\mu}$  region. A search of the available  $S_{\mu}$  sequences (3,41) (Greenberg, R. and Marcu, K., unpublished results) indicates that the AGGTTG sequence and its close analogues are quite rare in the entire  $S_{\mu}$  region. In 1400 bp 5' of the MPC-11  $S_{\mu}$  site, this sequence occurs twice with a 6/6 match, three times with a 5/6 match and four times with a 4/6 match and five functional  $C_{H}$  switches occur 3' of four of these fifteen sequences. We also found only two 4/6 matches for this sequence within the entire  $\sim 3$  kbp of the genetically unstable, tandemly repetitious portion of the Balb/c  $S_{\mu}$  region which basically only consists of two predominant short sequences, GAGCT and GGGGT (14,41) (Greenberg, R. and Marcu, K., unpublished results). Two 5/6 matched sequences also occur relatively close to the HindIII site which defines the 3' end of the length variation region within the MZ<sub>20</sub> sequence (see Figure 3) (3,14). However, sequences like AGGTTG are most evident in the  $S_{\alpha}$  region. Four 6/6 perfect matches and twenty-three 5/6 matches (with twenty of them as the sequence AGGCTG) occur randomly throughout 1.4 kbp of the  $S_{\alpha}$  region (5). One is tempted to draw an interesting analogy between this sequence specific element which may play a role in  $C_{H}$  switching and the bacterial Chi sequence ( $5' \text{GCTGGTGG} 3'$ ) which mediates generalized recombination events over considerable distances (49,50). A possible role for Chi like sequences in recombination events associated with  $C_{H}$  gene expression has recently been suggested

(51).

In addition to the proposed involvement of the sequence specific element described here, repeated sequences within S regions share short common sequences which may indirectly facilitate  $C_H$  switching by homologous recombination (2,41). The largest repeated S region sequence constitutes the majority of the  $S_\mu$  region which contains >3 kbp of DNA that almost solely consists of the short sequences GAGCT and GGGGT (41) (Greenberg, R. and Marcu, K., unpublished results). This  $S_\mu$  region shares extensive sequence homology with all of  $S_\alpha$  (12,14), the 3' portion of  $S_{\gamma 3}$  (Stanton, L. and Marcu, K., unpublished results) and the majority of  $S_\epsilon$  (Honjo, T., personal communication). However, overall homology of  $S_\mu$  with 5'  $S_{\gamma 3}$ ,  $S_{\gamma 1}$ ,  $S_{\gamma 2a}$  is much less substantial and completely lacking in the  $\mu$ - $\delta$  intragenic region (Marcu, K., unpublished results). Another strong argument for the importance of this highly repetitive portion of the  $S_\mu$  region for  $C_H$  switching is its conservation in other mouse species (13,14) and in humans (15,16). Evolutionary conservation arguments for the function of repetitive  $S_Y$  regions are not as convincing as for  $S_\mu$ . As shown in Figure 2D, the  $S_{\gamma 2b}$  repeat as revealed by BglIII digestion appears to be quite similar in different inbred mouse strains and wild mice but quite different in an unrelated Asian mouse species (*M. pahari*).

In summary, we believe that a unique, short sequence (AGGTTG and its minor variants) may be a new, biologically significant, recognition element for  $C_H$  switching because: (A) AGGTTG or its close analogues are found adjacent to either the donor or acceptor sites of all  $C_H$  switches thus far determined, (B) this sequence does not closely resemble a class of short, common sequences (GAGCT, GGGGT) found within the repetitive portions of  $C_H$  S regions which have been proposed to mediate S-S recombination by homologous recombination (12), (C) except for the complex MOPC 603  $\alpha$  switch event (5) all the  $S_\mu$  sites for other  $C_H$  genes are thus far clustered considerably 5' of the tandemly repetitious sequence component of the  $S_\mu$  region (largely consisting of GAGCT and GGGGT) suggesting an indirect involvement of these short, common sequences in  $C_H$  switching. We cannot as yet disprove the other likely possibility that the repetitive  $S_\mu$  region constitutes the primary switch region and all other events are secondary deletion phenomena associated with  $C_H$  gene switching. In any event, even these unusual secondary deletion events would then appear to have a strong preference for the sequence AGGTTG near the sites of recombination. Clearly, additional  $C_H$  switch sites need to be analyzed to either confirm or negate these and other suppositions concerning the precise molecular requirements for the  $C_H$  gene switch.

ACKNOWLEDGEMENTS

We would like to thank Meryl Diamond for technical assistance, Dr. Michael Potter for providing us with M.M. domesticus and M. pahari livers, Mark Davis and Lee Hood for the Balb/c mouse sperm library, S. Cory and T. Honjo for providing us with preprints of their manuscripts prior to their publication and Drs. Laurel Eckhardt, Shermaine Tilley and Barbara Birshtein for critically reading the manuscript. The patience of Ms. Deidra Sedivec and Lillian Geist in helping us prepare the manuscript for publication is also gratefully acknowledged. This work was supported by NIH grant GM-26939. KBM is a Research Career Development awardee of the National Institutes of Health.

REFERENCES

1. Davis, M.M., Calame, K., Early, P.W., Livant, D.L., Joho, R., Weissman, I.L. and Hood, L. (1980) *Nature* **283**, 733-739
2. Kataoka, T., Kawakami, T., Takahashi, N. and Honjo, T. (1980) *Proc. Natl. Acad. Sci. USA* **77**, 919-923
3. Sakano, H., Maki, R., Kurosawa, Y., Roeder, W. and Tonegawa, S. (1980) *Nature* **286**, 676-683
4. Early, P., Huang, H., Davis, M., Calame, K. and Hood, L. (1980) *Cell* **19**, 981-992
5. Davis, M.M., Kim, S.K. and Hood, L. (1980) *Science* **209**, 1360-1365
6. Obata, M., Kataoka, T., Nakai, S., Yamagishi, H., Takahashi, N., Yamawaki-Kataoka, Y., Nikaido, T., Shimzu, A. and Honjo, T. (1981) *Proc. Natl. Acad. Sci. USA* **78**, 2437-2441
7. Liu, C-P., Tucker, P.W., Mushinski, J.F. and Blattner, F.R. (1980) *Science* **209**, 1348-1353
8. Maki, R., Roeder, W., Traunecker, A., Sidman, C., Wabl, M., Raschke, W. and Tonegawa, S. (1981) *Cell* **24**, 353-365
9. Moore, K.W., Rogers, J., Hunkapiller, T., Early, P., Nottenburg, C., Weissman, I., Bazin, H., Wall, R. and Hood, L. (1981) *Proc. Natl. Acad. Sci. USA* **78**, 1800-1804
10. Dunnick, W., Rabbits, T.H. and Milstein, C. (1980) *Nature* **286**, 669-675
11. Takahashi, N., Kataoka, T. and Honjo, T. (1980) *Gene* **11**, 117-127
12. Kataoka, T., Miyata, T. and Honjo, T. (1981) *Cell* **23**, 357-368
13. Marcu, K.B., Banerji, J., Penncavage, N.A., Lang, R. and Arnheim, N. (1980a) *Cell* **22**, 187-196
14. Marcu, K.B., Arnheim, N., Banerji, J., Penncavage, N.A., Seperack, P., Lang, R., Miesfeld, R., Harris, L. and Greenberg, R. (1980b) *Cold Spring Harbor Symp. Quant. Biol.* **45**, 899-911
15. Ravetch, J.V., Kirsch, I.R. and Leder, P. (1980) *Proc. Natl. Acad. Sci. USA* **77**, 6734-6738
16. Takahashi, N., Nakai, S. and Honjo, T. (1980) *Nuc. Acids Res.* **8**, 5983-5991
17. Laskov, R. and Scharff, M.D. (1970) *J. Exp. Med.* **131**, 515-541
18. Scharff, M.C., Birshtein, B.K., Dharmgongartama, B. and Margulies, D.H. (1976) In *The Generation of Antibody Diversity*, A.J. Cunningham, ed. (New York: Academic Press), 165-174
19. Kenter, A.L., Eckhardt, L.A., Tilley, S.A. and Birshtein, B.K. (1981) In *Immunoglobulin Idiotypes and their Expression*, ICN-UCLA Symposia on Molecular and Cellular Biology, Janeway, C., Sercarz, E.E., Wigzell, H. and

- Fox, C.F. eds, (New York: Academic Press) Vol. 20, in press
20. Coffino, P. and Scharff, M.D. (1971) Proc. Natl. Acad. Sci. USA 68, 219-223
  21. Kuehl, W.M., Kaplan, B.A., Scharff, M.D., Nau, M., Honjo, T. and Leder, P. (1975) Cell 5, 139-147
  22. Schibler, U., Marcu, K.B. and Perry, R.P. (1978) Cell 15, 1495-1509
  23. Choi, E., Kuehl, M. and Wall, R. (1980) Nature 286, 776-779
  24. Seidman, J.G. and Leder, P. (1980) Nature 286, 779-783
  25. Schnell, H., Steinmetz, M., Zachau, H.G. and Schecter, I. (1980) Nature 286, 170-173
  26. Birshtein, B.K., Preud'homme, J.-L. and Scharff, M.D. (1974) Proc. Natl. Acad. Sci. USA 71, 3478-3482
  27. Preud'homme, J.-L., Birshtein, B.K. and Scharff, M.D. (1975) Proc. Natl. Acad. Sci. USA 72, 1427-1430
  28. Francus, T., Dharmgongartama, B., Campbell, R., Scharff, M.D. and Birshtein, B.K. (1978) J. Exp. Med. 147, 1535-1550
  29. Francus, T. and Birshtein, B.K. (1978) Biochemistry 17, 4324-4331
  30. Birshtein, B.K., Campbell, R. and Greenberg, M.L. (1980) Biochemistry 19, 1736-1737
  31. Kenter, A.L. and Birshtein, B.K. (1979) Science 206, 1307-1309
  32. Eckhardt, L., Tilley, S., Lang, R.B., Marcu, K.B. and Birshtein, B.K. (1981) (submitted for publication)
  33. Wahl, G.M., Stern, M. and Stark, G.R. (1979) Proc. Natl. Acad. Sci. USA 76, 3683-3687
  34. Sanger, F. and Coulson, A.R. (1978) FEBS Letters 87, 107-116
  35. Maxam, A.M. and Gilbert, W. (1980) Meth. Enzymol. 65, 499-559
  36. Southern, E.M. (1975) J. Mol. Biol. 98, 503-517
  37. Tucker, P., Marcu, K.B., Slightom, J. and Blattner, F.R. (1979a) Science 206, 1299-1303
  38. Tucker, P., Marcu, K.B., Newell, N., Richards, J. and Blattner, F.R. (1979b) Science 206, 1303-1306
  39. Zakut, R., Cohen, J. and Givol, D. (1980) Nuc. Acids Res. 8, 3591-3601
  40. Blattner, F.R., Williams, B.G., Blechl, A.E., Thompson, K.D., Faber, H.E., Furlong, L.A., Grunwald, D.J., Kiefer, D., Moore, D.D., Schumm, J.W., Sheldon, E.L. and Smithies, O. (1977) Science 196, 161-169
  41. Nikaido, T., Nakai, S. and Honjo, T. (1981) Nature 292, 845-848
  42. Yamawaki-Kataoka, Y., Kataoka, T., Takahashi, N., Obata, M. and Honjo, T. (1980) Nature 283, 786-789
  43. Ollo, R., Auffray, C., Morchamps, C. and Rougeon, F. (1981) Proc. Natl. Acad. Sci. USA 78, 2442-2446
  44. Marcu, K.B., Schibler, U. and Perry, R.P. (1978) J. Mol. Biol. 120, 381-400
  45. Cory, S., Webb, E., Gough, J. and Adams, J.M. (1981) Biochemistry 20, 2662-2671
  46. Max, E.E., Seidman, J.G. and Leder, P. (1979) Proc. Natl. Acad. Sci. USA 76, 3450-3454
  47. Sakano, H., Hüppi, K., Heinrich, G. and Tonegawa, S. (1979) Nature 280, 288-294
  48. Tyler, B. and Adams, J.M. (1980) Nuc. Acids Res. 8, 5579-5598
  49. Stahl, F.W. (1979) Ann. Rev. Genet. 13, 7-24
  50. Smith, T.R., Kunes, S.M., Schultz, D.W., Taylor, A. and Triman, K.L. (1981) Cell 24, 429-436
  51. Kenter, A.L. and Birshtein, B.K. (1981) Nature 293, 402-404
  52. Sikorav, J.L., Auffray, C. and Rougeon, F. (1980) Nuc. Acids Res. 8, 3143-3155
  53. Adams, J.M., Webb, E., Gerondakis, S. and Cory, S. (1980) Nuc. Acids Res. 8, 6019-6032
